# Supplementary material for: Activated Schwann cells in pancreatic cancer are linked to analgesia via suppression of spinal astroglia and microglia
Source: HighWire-hosted journal article supplement (doi:10.1136/gutjnl-2015-309784), 2016-01-13

**Supplementary figure 1. Secretion of pro-inflammatory cytokines and growth factors from hypoxic hSC.** Multiplex ELISA was used to quantify the amounts of a large panel of interleukins (IL, a), inflammatory mediators (b) and growth factors (c) in the supernatants of hypoxic hSC (for the complete list of the analyzed cytokines, please refer to the supplementary methods). The concentrations were expressed in pg/ml. Experiments were repeated three times. The \*p values correspond to the one-way ANOVA p values.

**Supplementary figure 2. Impact of hypoxia upon the secretion of platelet-derived growth factor (PDGF), IL-1beta, IL-4, IL-10, IL-13 and IL-17 from hSC.** The amounts of these cytokines in hSC supernatants demonstrated a significant variation between normoxic and hypoxic conditions, but their levels constantly remained below 10pg/ml, thereby potentially limiting their biological relevance. Experiments were repeated three times. The \*p values correspond to the one-way ANOVA p values.

**Supplementary figure 3. The impact of interleukin-6 and interleukin-1 $\beta$  on hSC activation by hypoxia and PCC.** (a) Hypoxic hSC were supplied with specific blocking antibodies against interleukin-6 (anti-IL-6) or interleukin-1 $\beta$  (anti-IL-1 $\beta$ ) or with nonimmunized mouse IgG1 antibodies in their growth media and compared for the intracellular amounts of GFAP (G), Nestin (N) and Vimentin (V) at 24 hours of hypoxia exposure via immunoblotting. Blockade of IL-1 $\beta$  in hypoxic hSC supernatants did not influence intracellular G, N or V, but there was a tendency towards decreased G and N after IL-6-blockade, though not significant. Unpaired t-test. Experiments were repeated three times. (b) hSC were treated with the supernatants/SN of the PCC lines SU86.86 or T3M4 for 24 hours and compared to control hSC (Ctrl., grown in their serum-free growth medium supplied with serum-free PCC medium) for the phosphorylation status of the IL-6 downstream mediator STAT3 via immunoblotting (left), densitometry of the blot membranes (middle) and

via double-immunolabeling against phospho-STAT3 (pSTAT3) and with DAPI. Experiments were repeated three times. (c) However, addition of anti-IL-6 – but not of anti-IL-1 $\beta$  – significantly attenuated N expression (when added to the supernatants of the SU86.86 PCC) or *both* G and N expression in hSC (when added to the supernatants of the T3M4 PCC) after 48 hours of SN treatment. Ga: GAPDH. Experiments were performed in triplicates. Results were expressed as % of loading control (GAPDH). Unpaired t-test.

**a**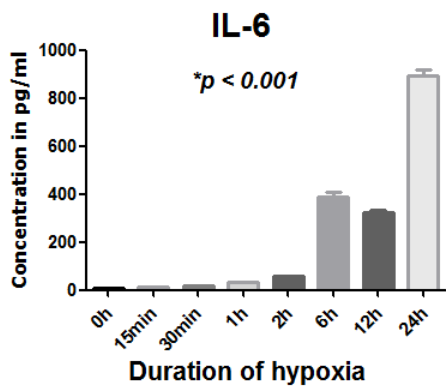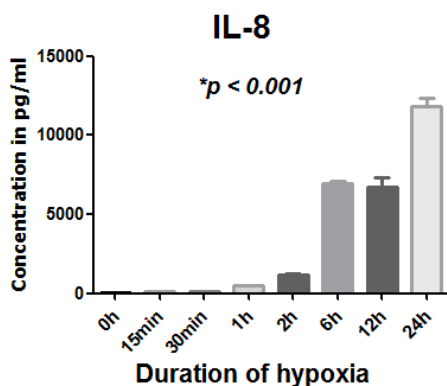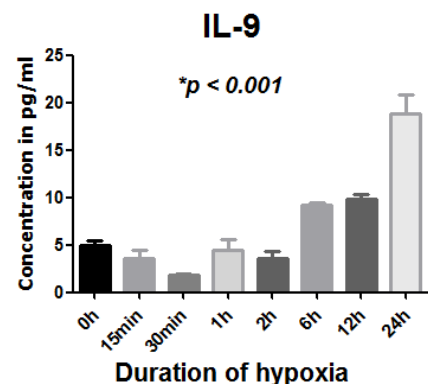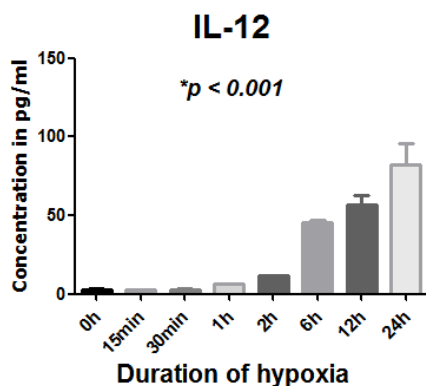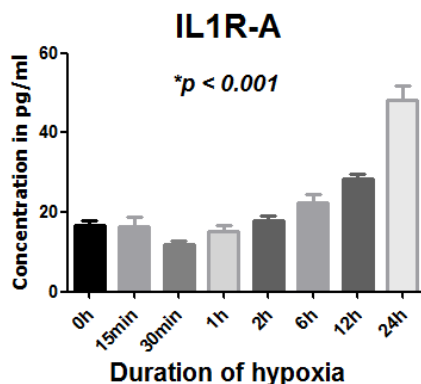**b**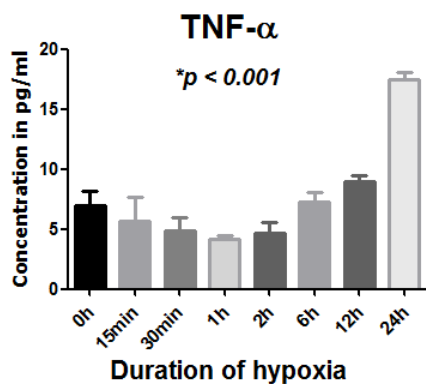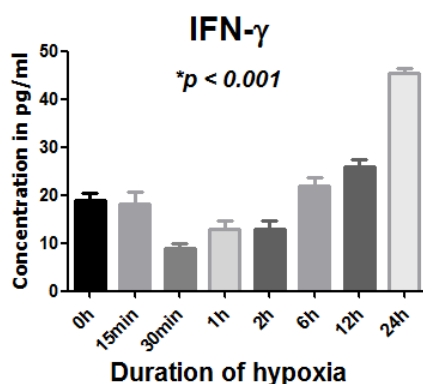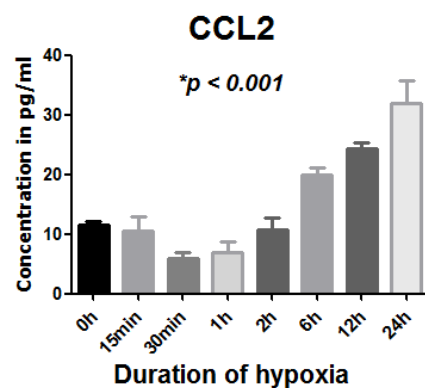**c**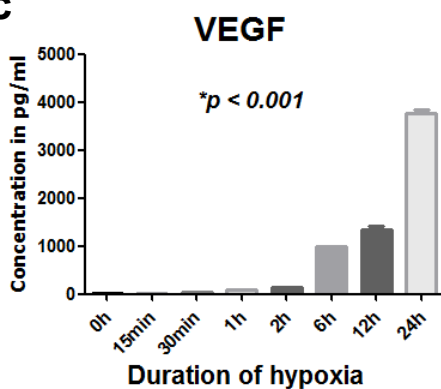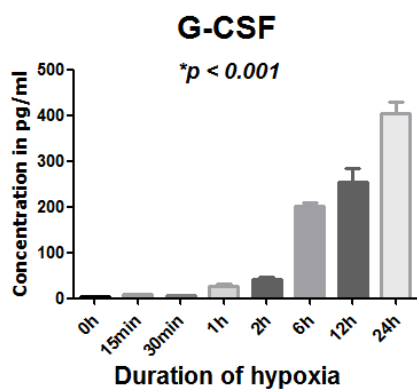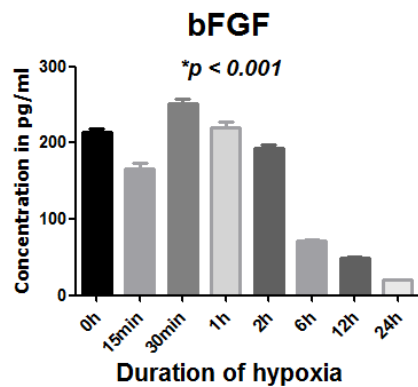

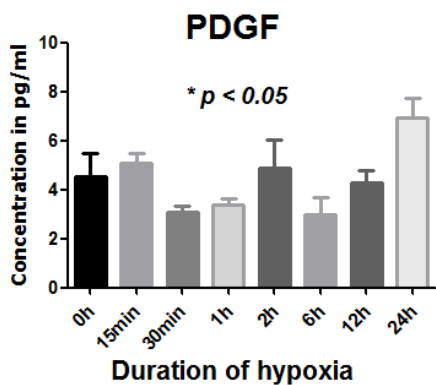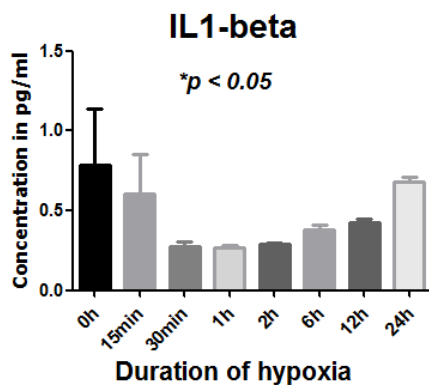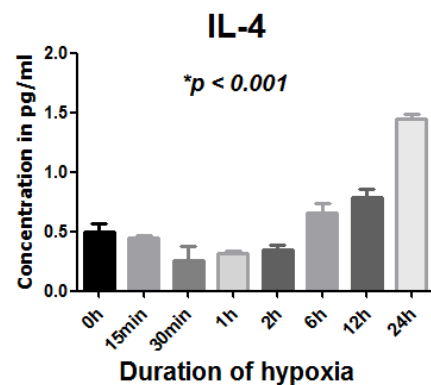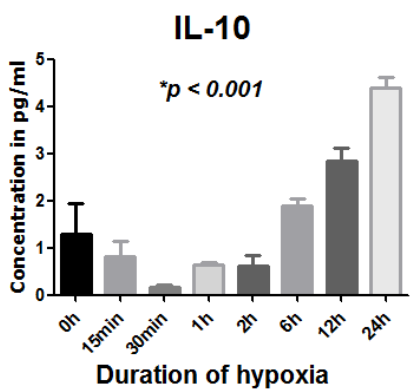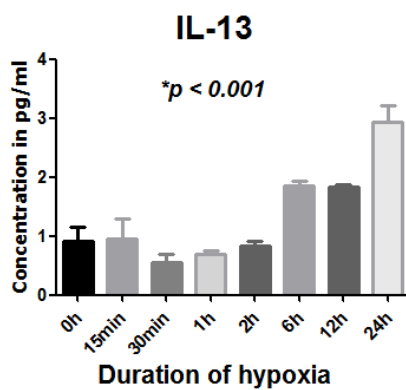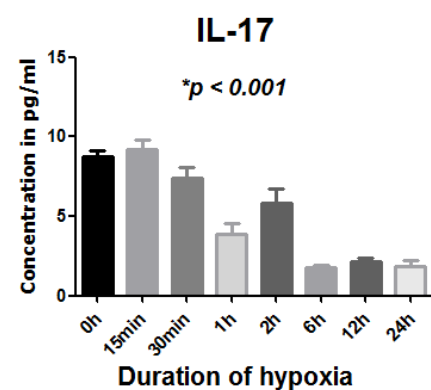

**a**

Normoxia  
Hypoxia  
Normoxia + anti IL-6  
Hypoxia + anti IL-6  
Normoxia + IgG<sub>1</sub>  
Hypoxia + IgG<sub>1</sub>  
Normoxia + anti IL-1 $\beta$   
Hypoxia + anti IL-1 $\beta$

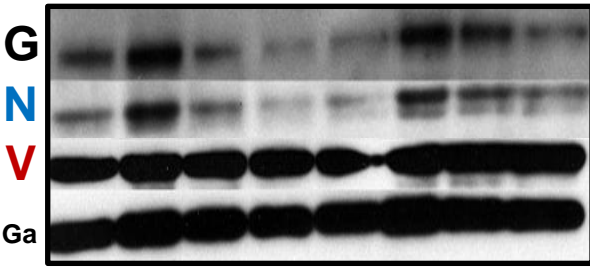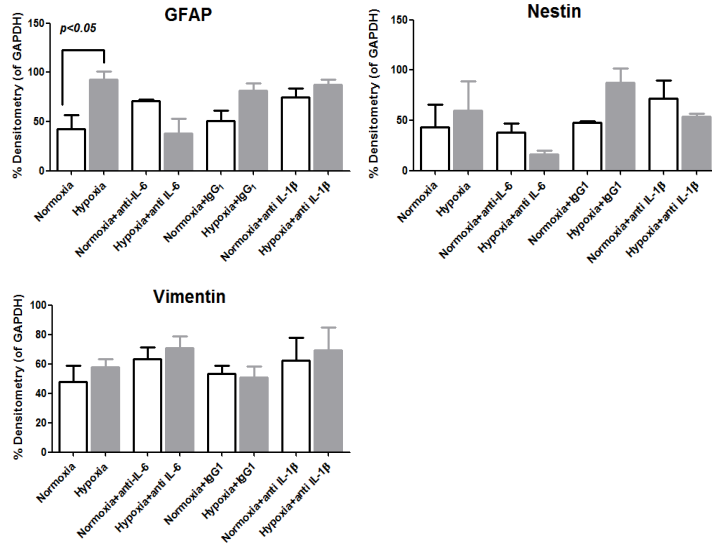

**b**

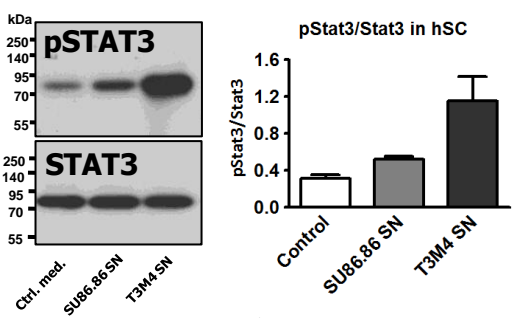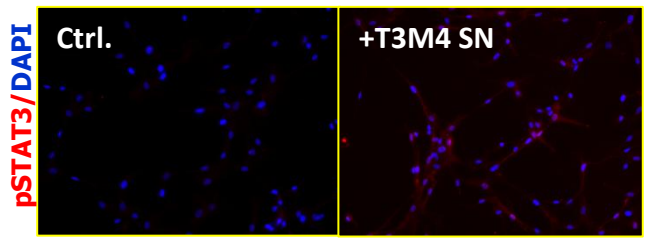

**c**

SU86.86 SN  
SU86.86 SN+ IgG<sub>1</sub>  
SU86.86 SN+ anti IL-1 $\beta$   
SU86.86 SN+ anti IL-6

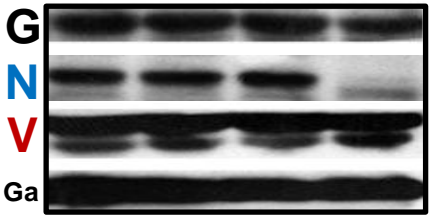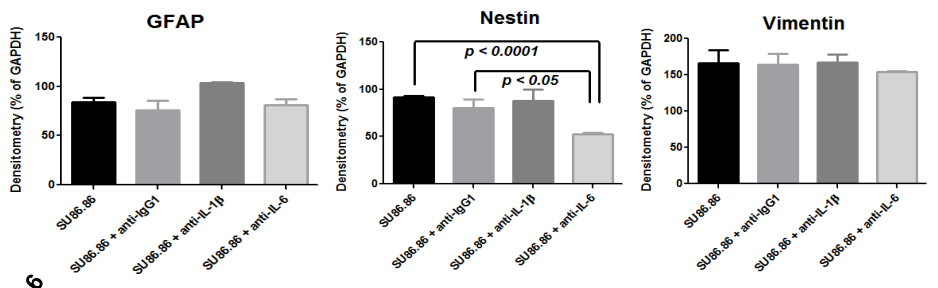

T3M4 SN  
T3M4 SN+ IgG<sub>1</sub>  
T3M4 SN+ anti IL-1 $\beta$   
T3M4 SN+ anti IL-6

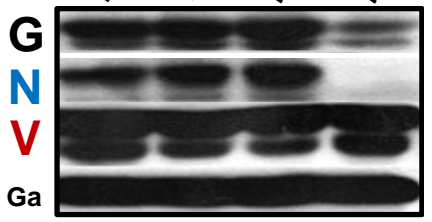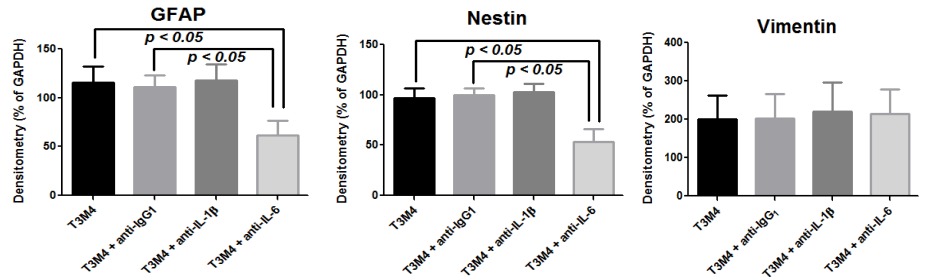

Supplement: gutjnl-2015-309784supp_figures.pdf [file gutjnl-2015-309784supp_figures.pdf]
