# Supplementary material for: Activated Schwann cells in pancreatic cancer are linked to analgesia via suppression of spinal astroglia and microglia
Source: HighWire-hosted journal article supplement (doi:10.1136/gutjnl-2015-309784), 2016-01-13
Supplement: gutjnl-2015-309784supp_table.pdf [file gutjnl-2015-309784supp_table.pdf]

**Table 1. Primary and secondary antibodies**

| Antibody                                  | Species | Type       | Dilution                    | Source                                 |
|-------------------------------------------|---------|------------|-----------------------------|----------------------------------------|
| Alexa Fluor® Goat anti-mouse IgG 488/594  | Goat    | Polyclonal | 1:400 (IF)                  | Invitrogen, Karlsruhe, Germany         |
| Alexa Fluor® Goat anti-rabbit IgG 488/594 | Goat    | Polyclonal | 1:400 (IF)                  | Invitrogen, Karlsruhe, Germany         |
| beta-III-tubulin                          | Mouse   | Monoclonal | 1:200 (IF)                  | Millipore, MA, Billerica, USA          |
| BrdU                                      | Rat     | Monoclonal | 1:100 (IF)                  | Santa Cruz, Heidelberg, Germany        |
| CA-IX                                     | Rabbit  | Polyclonal | 1:1000 (IHC), 1:500 (IF)    | Abcam; Cambridge, UK                   |
| Cytokeratin 19                            | Mouse   | Monoclonal | 1:200 (IF)                  | Santa Cruz, Heidelberg, Germany        |
| GAPDH                                     | Mouse   | Monoclonal | 1:5000 (WB)                 | Santa Cruz, Heidelberg, Germany        |
| GFAP                                      | Rabbit  | Polyclonal | 1:1000 (WB), 1:400 (IHC/IF) | DAKO, Hamburg, Germany                 |
| HIF-1 $\alpha$                            | Rabbit  | Polyclonal | 1:300 (IHC/IF)              | Santa Cruz, Heidelberg, Germany        |
| Iba-1                                     | Mouse   | Monoclonal | 1:200 (IF)                  | Cell Signaling, Frankfurt, Germany     |
| IL-6                                      | Rabbit  | Polyclonal | 1:200 (IF)                  | Proteintech Europa, Manchester, UK     |
| ki67                                      | Mouse   | Monoclonal | 1:100 (IF)                  | DAKO, Hamburg, Germany                 |
| Nestin                                    | Rabbit  | Polyclonal | 1:5000 (WB)                 | Millipore, MA, Billerica, USA          |
| p75NTR                                    | Mouse   | Monoclonal | 1:200 (IF)                  | Sigma-Aldrich, Taufkirchen, Germany    |
| PGP 9.5                                   | Mouse   | Monoclonal | 1: 1000 (IHC)               | DAKO, Hamburg, Germany                 |
| phospho-ERK                               | Rabbit  | Polyclonal | 1:200 (IF)                  | Cell Signaling, Frankfurt, Germany     |
| phospho-p38                               | Rabbit  | Polyclonal | 1:200 (IF)                  | Cell Signaling, Frankfurt, Germany     |
| pSTAT3                                    | Rabbit  | Polyclonal | 1:2000 (WB)                 | Cell Signaling, Frankfurt, Germany     |
| S100                                      | Mouse   | Monoclonal | 1:200 (IF)                  | Millipore, MA, Billerica, USA          |
| Sox10                                     | Rabbit  | Polyclonal | 1:400 (IF)                  | Novus Biologicals, Littleton, CO, USA) |
| STAT3                                     | Rabbit  | Polyclonal | 1:2000 (WB)                 | Cell Signaling, Frankfurt, Germany     |
| Vimentin                                  | Mouse   | Monoclonal | 1:2000 (WB)                 | Invitrogen, Paisley, England           |

*IHC: immunohistochemistry, IF: immunofluorescence, WB: Western blot*
